# Supplementary material for: Synthesis and characterisation of first row transition metal complexes of functionalized 1,2,4-benzothiadiazines
Source: Royal Society of Chemistry journal article supplement (doi:10.1039/c4dt01413h), 2014-07-09
Supplement: c4dt01413h1.pdf [file c4dt01413h1.pdf]

## Synthesis and Characterisation of First Row Transition Metal Complexes of Functionalized 1,2,4-Benzothiadiazines

E. R. Clark, M. U. Anwar, B. J. Leontowicz, Y. Beldjoudi, J. J. Hayward, W. Chan, E. L. Gavey, M. Pilkington, E. Zysman-Colman and J. M. Rawson\*

### Supplementary Information

- Fig. S1 Solution UV/vis spectra of selected derivatives of **1**, along with **3** and **4** as well as the parent ligand **L** to emphasise the ligand-based nature of the spectroscopic properties.
- Fig. S2 Crystal packing of **1** in the *ab* plane revealing the two dimensional nature of the hydrogen-bonded motif.
- Fig. S3 Experimental and simulation EPR spectra of **2** in solid-state at room temperature (295K);  $g_{xx} = g_{yy} = 2.054$ ,  $g_{zz} = 2.200$  ( $\langle g \rangle = 2.103$ ),  $a_{xx} = a_{yy} = a_{zz} = 25\text{G}$ ,  $\Delta H_{xx} = 175$ ,  $\Delta H_{yy} = 25$ ,  $\Delta H_{zz} = 75\text{ G}$ .
- Fig. S4 Curie-Weiss behaviour of **2** (left) ( $C = 0.416\text{ emu.K.mol}^{-1}$ ,  $g = 2.103$ ) and  $M$  vs  $H$  plot for **2** at 5 K (right) with the dotted line representing the fit to the Brillouin function for an  $S = \frac{1}{2}$  paramagnet ( $g = 2.103$ ).
- Fig. S5 Magnetic response of **3** in the region 5 K – 300 K.
- Fig. S6 X-band EPR spectrum of **4** cast in a thin film of *p*-ClC<sub>6</sub>H<sub>4</sub>CN measured at room temperature. Simulation parameters were:  $g_{11} = 1.950$ ,  $g_{22} = g_{33} = 1.994$ ,  $a_{V(11)} = 172\text{ G}$  and  $a_{V(22)} = a_{V(33)} = 66\text{ G}$ ,  $\Delta H_{pp(11)} = 55\text{ G}$ ,  $\Delta H_{pp(22)} = \Delta H_{pp(33)} = 42\text{ G}$  (Lorentzian lineshape).

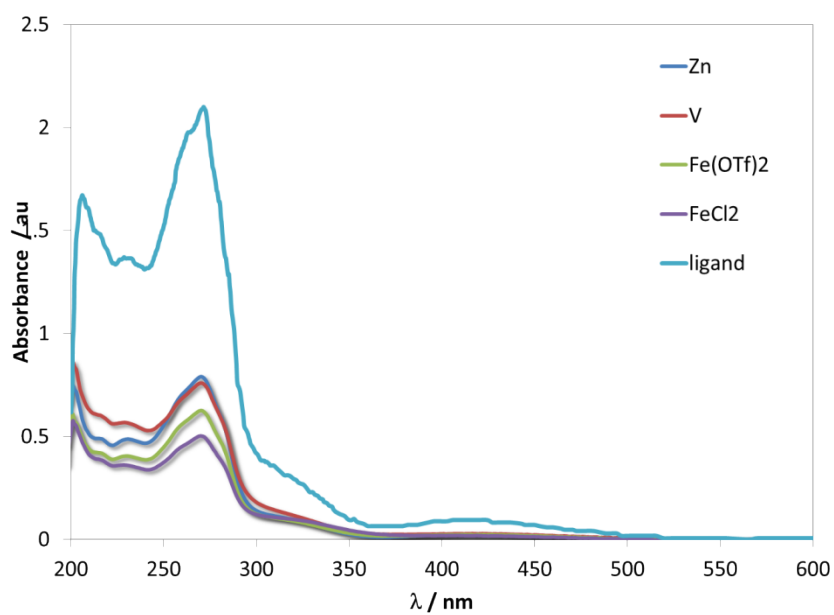

**Fig. S1:** Solution UV/vis spectra of selected derivatives of **1**, along with **3** and **4** as well as the parent ligand **L** to emphasise the ligand-based nature of the spectroscopic properties.

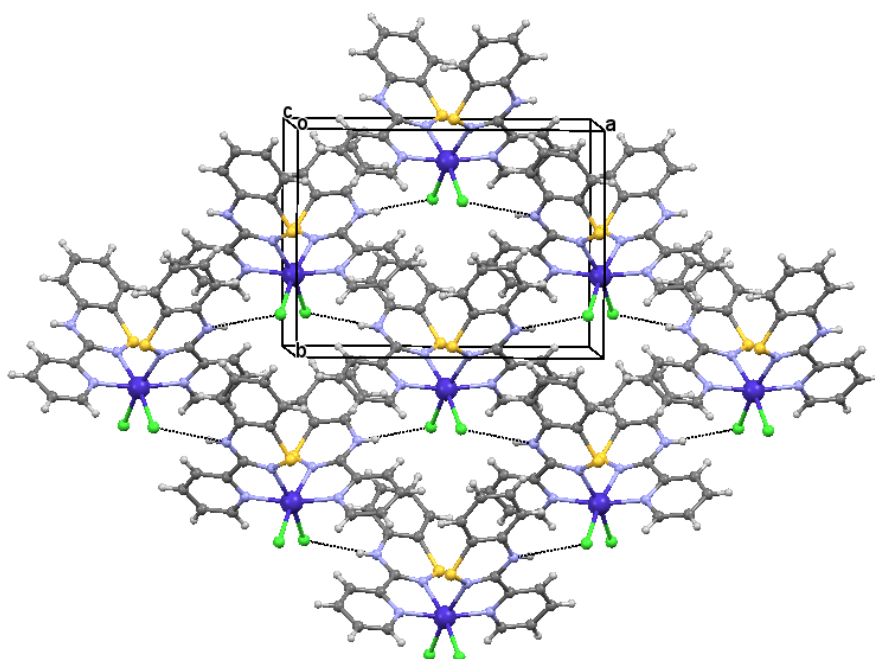

**Fig. S2** Crystal packing of **1** in the *ab* plane revealing the two dimensional nature of the hydrogen-bonded motif.

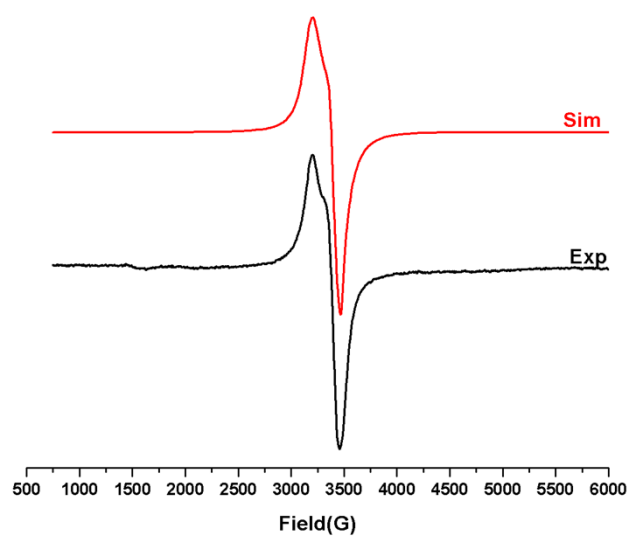

**Fig. S3** Experimental and simulation EPR spectra of **2** in solid-state at room temperature (295K);  $g_{xx} = g_{yy} = 2.054$ ,  $g_{zz} = 2.200$  ( $\langle g \rangle = 2.103$ ),  $a_{xx} = a_{yy} = a_{zz} = 25\text{G}$ ,  $\Delta H_{xx} = 175$ ,  $\Delta H_{yy} = 25$ ,  $\Delta H_{zz} = 75\text{ G}$ .

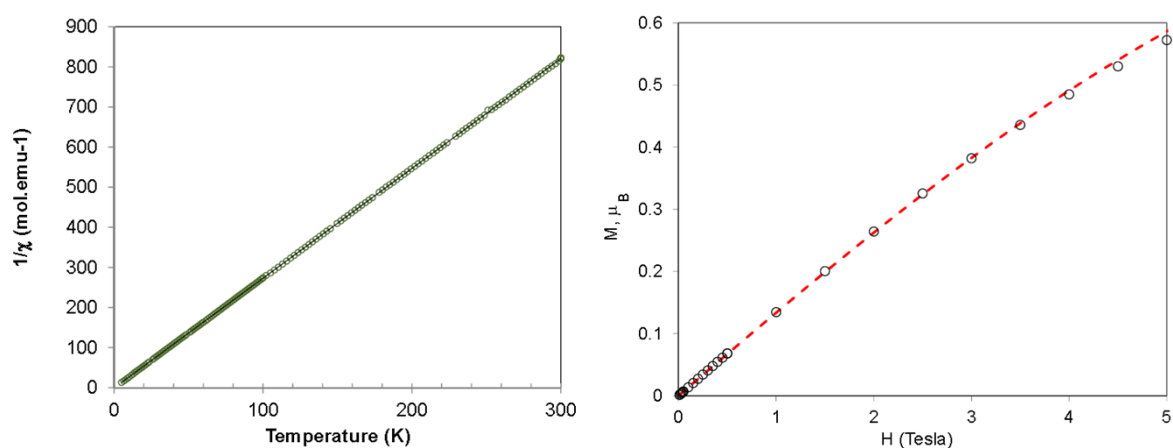

**Fig. S4** Curie-Weiss behaviour of **2** (left) ( $C = 0.416\text{ emu.K.mol}^{-1}$ ,  $g = 2.103$ ) and  $M$  vs  $H$  plot for **2** at 5K (right) with the dotted line representing the fit to the Brillouin function for an  $S = \frac{1}{2}$  paramagnet ( $g = 2.103$ ).

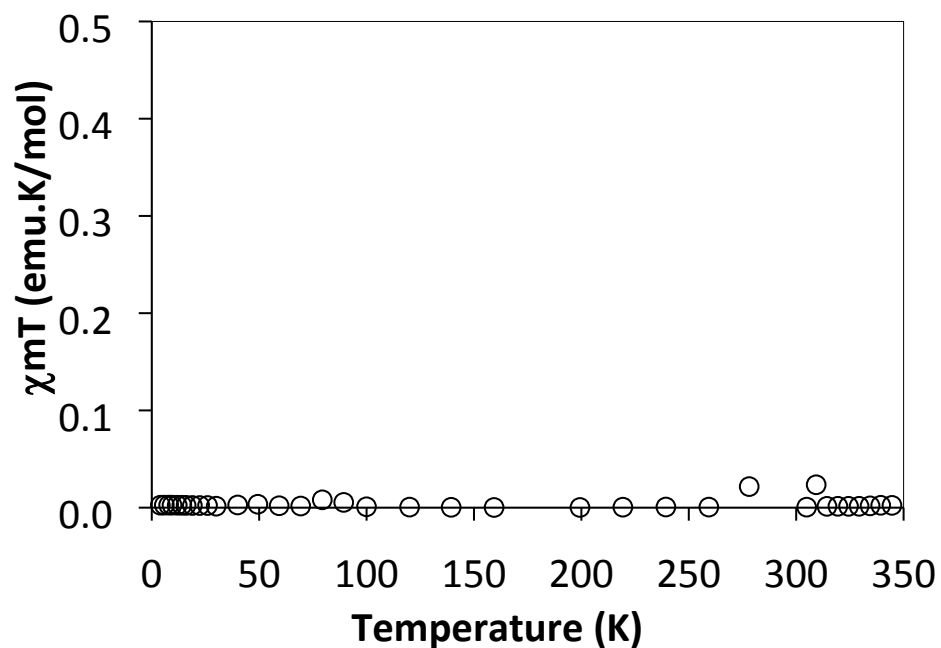

Fig. S5 Magnetic response of **3** in the region 5 K – 300 K.

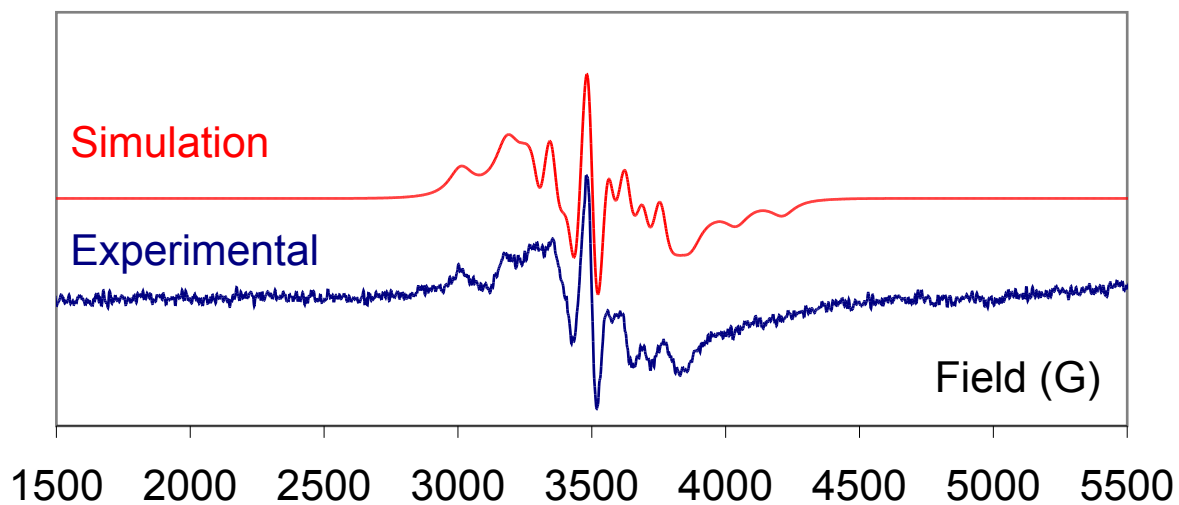

Fig. S6 X-band EPR spectrum of **4** cast in a thin film of *p*-ClC<sub>6</sub>H<sub>4</sub>CN measured at room temperature. Simulation parameters were:  $g_{11} = 1.950$ ,  $g_{22} = g_{33} = 1.994$ ,  $a_{V(11)} = 172$  G and  $a_{V(22)} = a_{V(33)} = 66$  G,  $\Delta H_{pp(11)} = 55$  G,  $\Delta H_{pp(22)} = \Delta H_{pp(33)} = 42$  G (Lorentzian lineshape).
